# Supplementary material for: Facile synthesis of SnO2 nanoparticles dispersed nitrogen doped graphene anode material for ultrahigh capacity lithium ion battery applications
Source: Royal Society of Chemistry journal article supplement (doi:10.1039/c3ta01515g), 2013-01-01
Supplement: c3ta01515g.pdf [file c3ta01515g.pdf]

## Supporting Information

### **Facile synthesis of SnO<sub>2</sub> nanoparticles dispersed nitrogen doped graphene anode material for ultrahigh capacity lithium ion battery applications**

*B. P. Vinayan, and S. Ramaprabhu\**

[\*] Prof. *S. Ramaprabhu*, *Corresponding Author*, Alternative Energy and Nanotechnology Laboratory (AENL), Nano Functional Materials Technology Centre (NFMTC), Department of Physics, Indian Institute of Technology Madras, Chennai 600036, India

Phone: +91-44-22574862, Fax: +91-44-22570509/22574852

\*Email: [ramp@iitm.ac.in](mailto:ramp@iitm.ac.in)

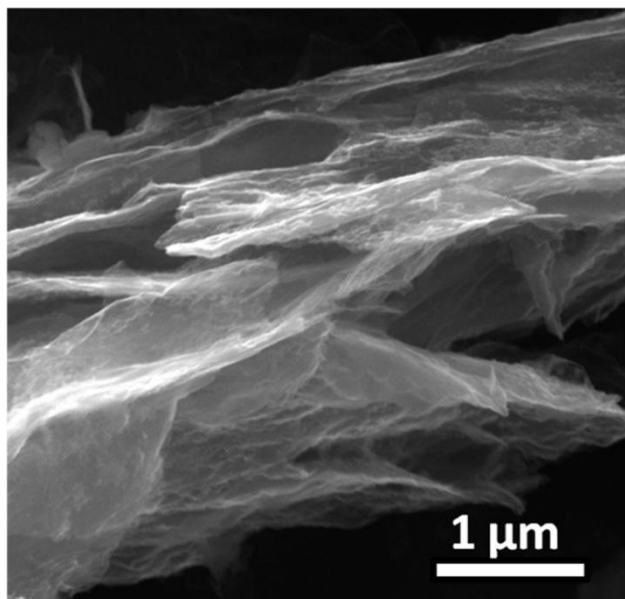

**Figure S1:** SEM image of SnO<sub>2</sub>/NG anode material

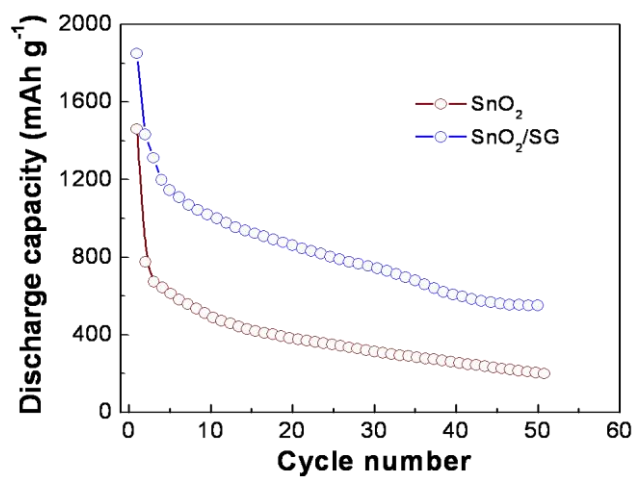

**Figure S2:** Cyclic stability of bare SnO<sub>2</sub> nanoparticles and SnO<sub>2</sub>/solar exfoliated graphene electrode materials at a current density of 90 mA g<sup>-1</sup>.

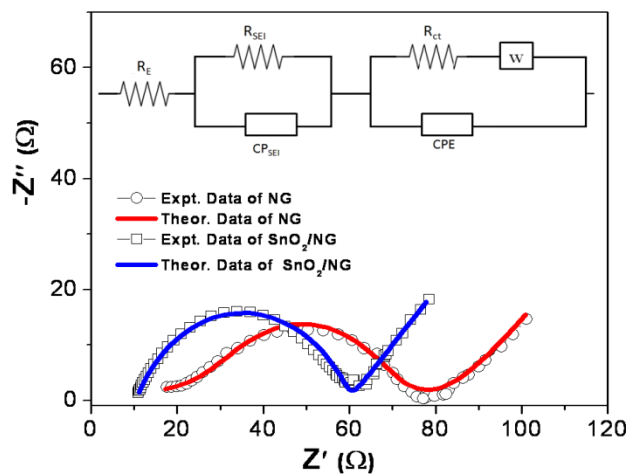

**Figure S3:** Nyquist plot and the equivalent circuit for a fresh cell with the electrode materials NG and SnO<sub>2</sub>/NG.

**Table S1:** Impedance parameters for a fresh cell with the electrode materials NG and SnO<sub>2</sub>/NG.

| Electrode material   | R <sub>E</sub> (Ω) | (R <sub>SEI</sub> + R <sub>ct</sub> ) (Ω) | CP <sub>SEI</sub> + CPE (μF) |
|----------------------|--------------------|-------------------------------------------|------------------------------|
| NG                   | 17.3               | 92.5                                      | 40.5                         |
| SnO <sub>2</sub> /NG | 10.1               | 70.1                                      | 2.4                          |
